# Supplementary material for: Development of safe, effective and immunogenic vaccine candidate for diarrheagenic Escherichia coli main pathotypes in a mouse model
Source: PubMed Central journal article supplement (PMC4748553; doi:10.1186/s13104-016-1891-z), 2016-02-09

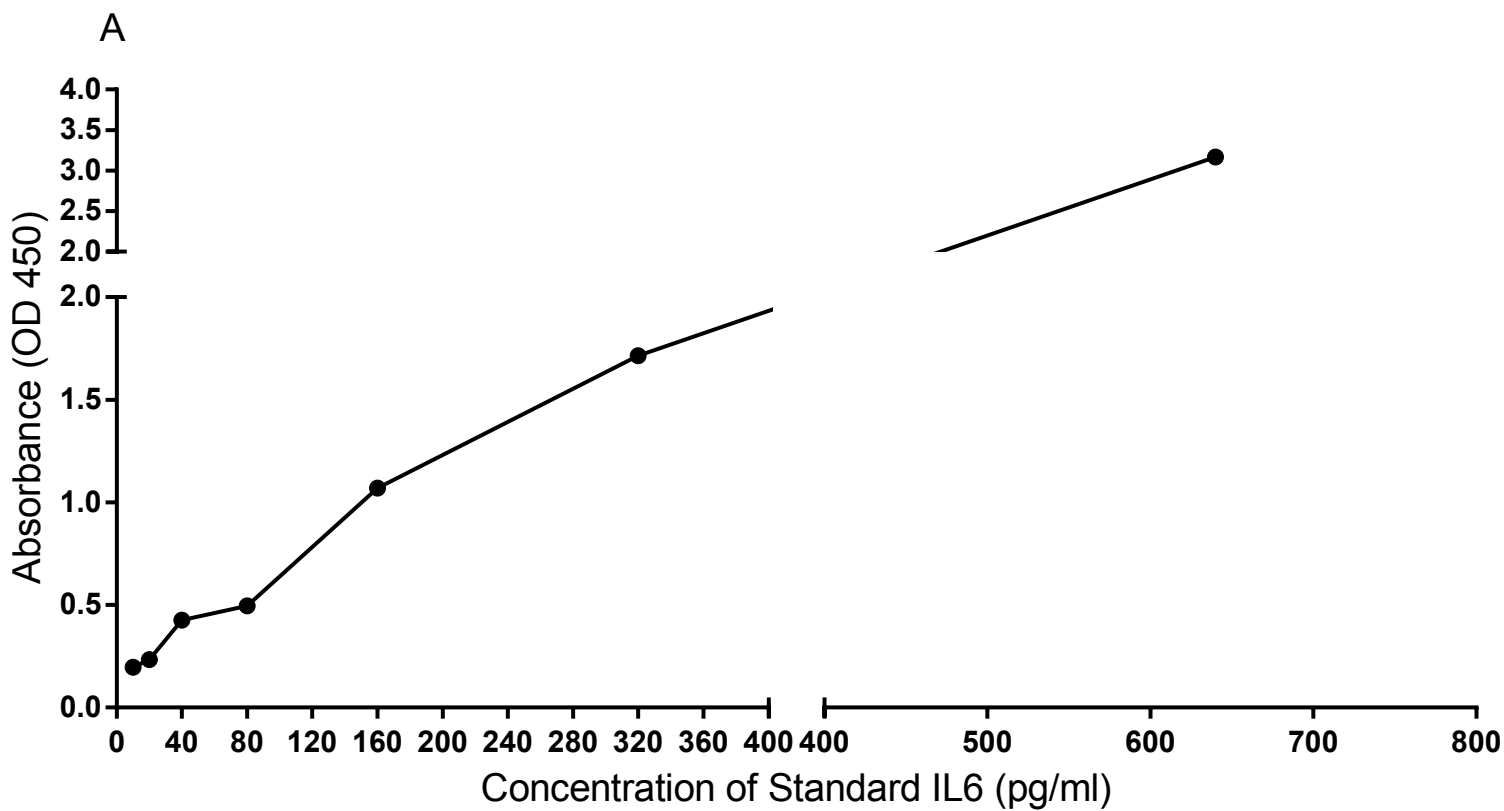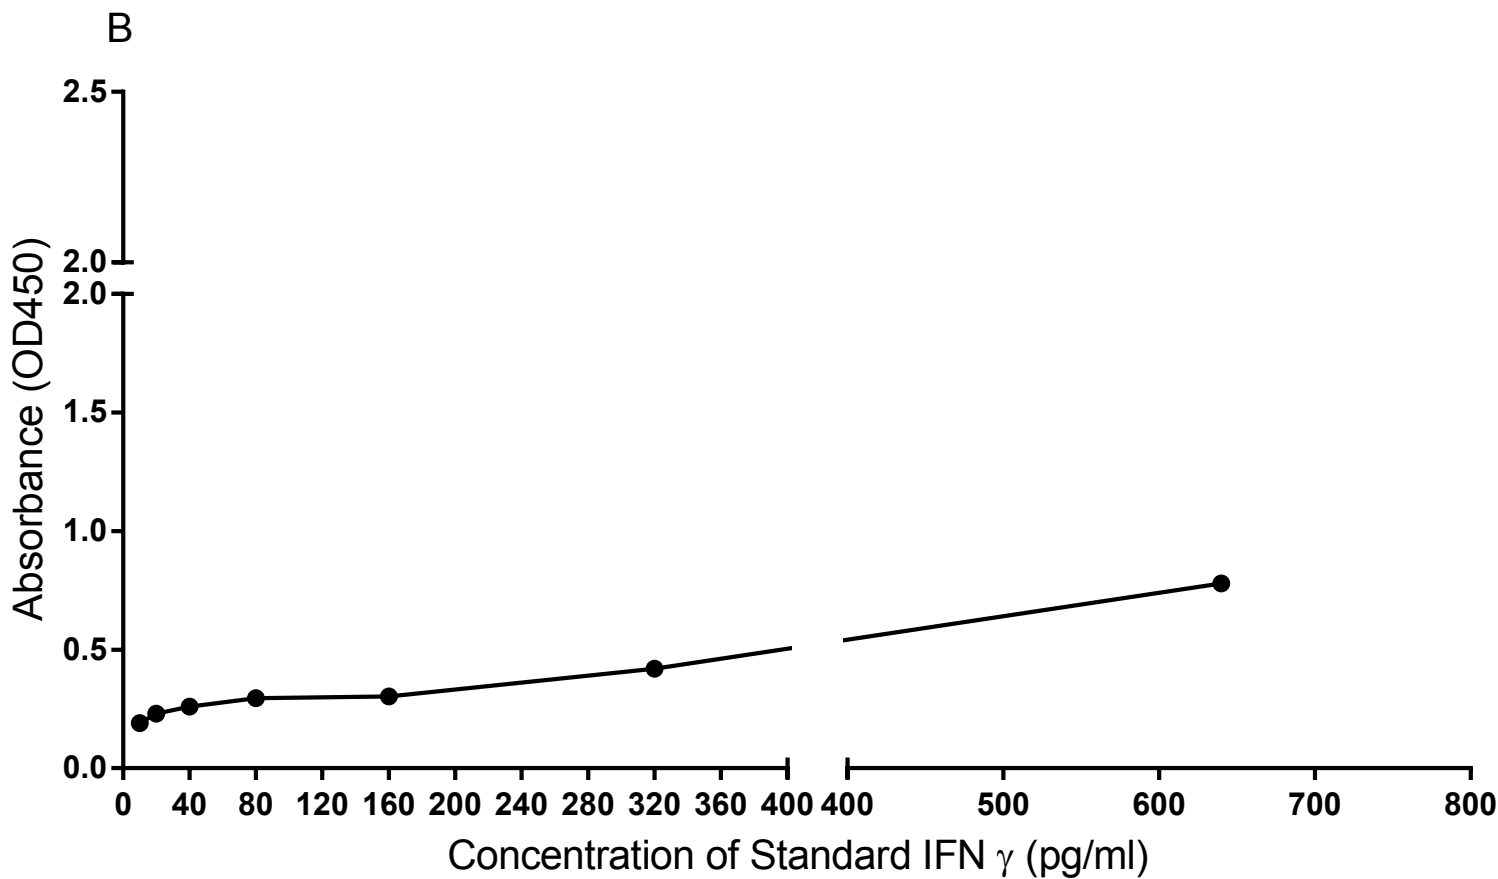

Supplement: 13104_2016_1891_MOESM7_ESM.pdf [file 13104_2016_1891_MOESM7_ESM.pdf]
